# Supplementary material
Source: MDPI journal article supplement (https://www.mdpi.com/2071-1050/13/13/7509)
Supplement: s1 [file s1]

**Table S1.** 2<sup>3</sup> factorial planning.

| Experiment | $\chi_1$ | $\chi_2$ | $\chi_3$ |
|------------|----------|----------|----------|
| 1          | -1       | -1       | -1       |
| 2          | 1        | -1       | -1       |
| 3          | -1       | 1        | -1       |
| 4          | 1        | 1        | -1       |
| 5          | -1       | -1       | 1        |
| 6          | 1        | -1       | 1        |
| 7          | -1       | 1        | 1        |
| 8          | 1        | 1        | 1        |
| 9          | -1.68    | 0        | 0        |
| 10         | 1.68     | 0        | 0        |
| 11         | 0        | -1.68    | 0        |
| 12         | 0        | 1.68     | 0        |
| 13         | 0        | 0        | -1.68    |
| 14         | 0        | 0        | 1.68     |
| 15         | 0        | 0        | 0        |
| 16         | 0        | 0        | 0        |
| 17         | 0        | 0        | 0        |
| 18         | 0        | 0        | 0        |
| 19         | 0        | 0        | 0        |
| 20         | 0        | 0        | 0        |

**Table S2.** Coded levels of independents variables used in the first factorial planning, using water as solvent.

| Studied parameters | Symbol | Level |           |         |           |       |
|--------------------|--------|-------|-----------|---------|-----------|-------|
|                    |        | Axial | Factorial | Central | Factorial | Axial |
|                    |        | -1.68 | -1        | 0       | 1         | 1.68  |
| Temperature (°C)   | T      | 44.8  | 55.00     | 70.00   | 85.00     | 95.20 |
| Time (min)         | t      | 4.80  | 15.00     | 30.00   | 45.00     | 55.20 |
| Solid-liquid ratio | R      | 0.05  | 0.07      | 0.10    | 0.13      | 0.05  |

**Table S3.** Coded levels of independents variables used in the second factorial planning, using [Ch][Bic] as solvent.

| Studied parameters | Symbol | Level |           |         |           |       |
|--------------------|--------|-------|-----------|---------|-----------|-------|
|                    |        | Axial | Factorial | Central | Factorial | Axial |
|                    |        | -1.68 | -1        | 0       | 1         | 1.68  |
| Temperature (°C)   | T      | 24.80 | 35.00     | 50.00   | 65.00     | 24.80 |
| Concentration (M)  | C      | 0.16  | 0.50      | 1.00    | 1.50      | 0.16  |
| Solid-liquid ratio | R      | 0.05  | 0.07      | 0.10    | 0.13      | 0.05  |

**Table S4.** Experimental data and response surface predicted values of the factorial planning, using water as solvent.

| Experiment | t (min) | T (°C) | Ratio S/L | Experimental caffeine yield (wt%) | Predicted yield caffeine yield (wt%) | Relative deviation (%) |
|------------|---------|--------|-----------|-----------------------------------|--------------------------------------|------------------------|
| 1          | 15.00   | 55.00  | 0.09      | 1.10                              | 1.47                                 | 4.53                   |
| 2          | 15.00   | 85.00  | 0.07      | 1.33                              | 2.01                                 | 2.10                   |
| 3          | 45.00   | 55.00  | 0.07      | 1.07                              | 1.49                                 | -2.80                  |
| 4          | 45.00   | 85.00  | 0.07      | 1.39                              | 2.48                                 | -1.37                  |
| 5          | 15.00   | 55.00  | 0.13      | 1.00                              | 1.30                                 | 2.25                   |
| 6          | 15.00   | 85.00  | 0.13      | 1.08                              | 1.70                                 | 2.98                   |
| 7          | 45.00   | 55.00  | 0.13      | 1.09                              | 1.32                                 | -2.28                  |
| 8          | 45.00   | 85.00  | 0.13      | 1.33                              | 2.17                                 | -3.74                  |
| 9          | 30.00   | 44.80  | 0.10      | 1.04                              | 1.32                                 | -1.08                  |
| 10         | 30.00   | 90.00  | 0.10      | 1.38                              | 2.49                                 | 0.36                   |
| 11         | 4.80    | 70.00  | 0.10      | 1.15                              | 1.41                                 | -7.44                  |
| 12         | 55.20   | 70.00  | 0.10      | 1.04                              | 1.82                                 | 6.61                   |
| 13         | 30.00   | 70.00  | 0.05      | 1.34                              | 1.92                                 | -1.33                  |
| 14         | 30.00   | 70.00  | 0.15      | 1.13                              | 1.52                                 | 1.01                   |
| 15         | 30.00   | 70.00  | 0.10      | 1.18                              | 1.81                                 | -0.53                  |
| 16         | 30.00   | 70.00  | 0.10      | 1.17                              | 1.81                                 | -0.18                  |
| 17         | 30.00   | 70.00  | 0.10      | 1.12                              | 1.81                                 | 4.30                   |
| 18         | 30.00   | 70.00  | 0.10      | 1.20                              | 1.81                                 | -2.51                  |
| 19         | 30.00   | 70.00  | 0.10      | 1.16                              | 1.81                                 | 1.35                   |
| 20         | 50.00   | 70.00  | 0.10      | 1.20                              | 1.81                                 | -2.34                  |

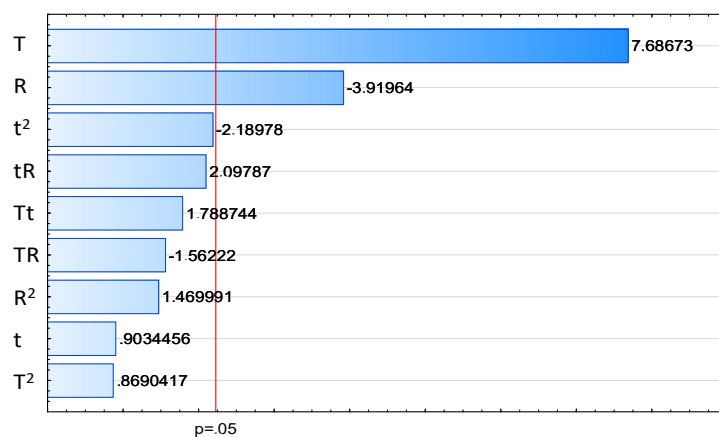

**Figure S1.** Pareto chart, using water as solvent.  $r^2 = 0.904$ ;  $\text{adj-}r^2 = 0.817$ ;  $p\text{-value} = 0.000528$ .

T- temperature, R - solid-liquid ratio and t-time.

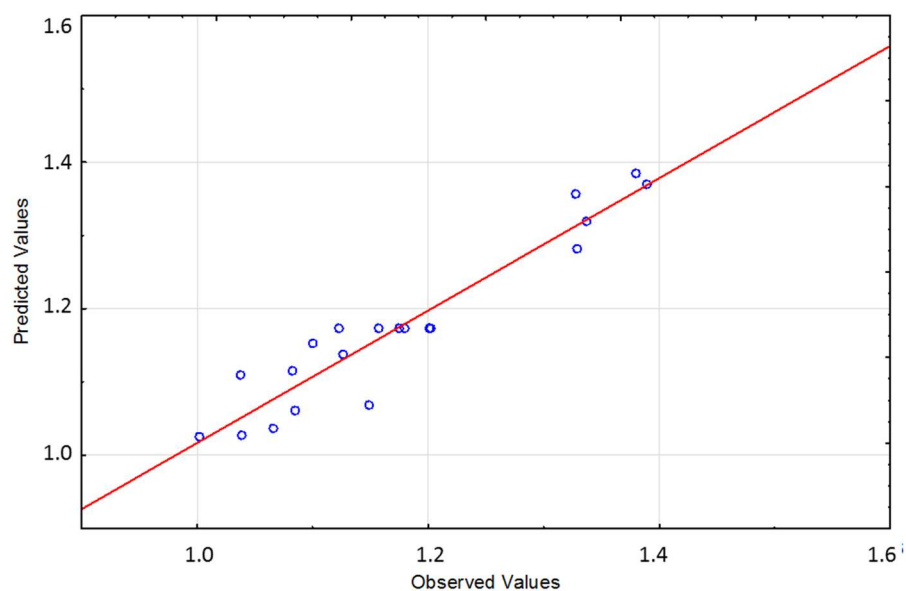

**Figure S2.** Predict vs observed values of caffeine yield (wt%) using water as solvent.

**Table S5.** Experimental data and response surface predicted values of the factorial planning, using [Ch][Bic] as solvent.

| Experiment | T (°C) | C (M) | Ratio S/L | Experimental<br>caffeine yield (wt%) | Predicted<br>caffeine yield (wt%) | Relative deviation<br>(%) |
|------------|--------|-------|-----------|--------------------------------------|-----------------------------------|---------------------------|
| 1          | 35.00  | 0.50  | 0.07      | 1.47                                 | 1.47                              | 0.03                      |
| 2          | 65.00  | 0.50  | 0.07      | 1.91                                 | 2.01                              | 4.73                      |
| 3          | 35.00  | 1.51  | 0.07      | 1.56                                 | 1.49                              | -4.47                     |
| 4          | 65.00  | 1.51  | 0.07      | 2.48                                 | 2.48                              | 0.07                      |
| 5          | 35.00  | 0.50  | 0.13      | 1.28                                 | 1.30                              | 1.59                      |
| 6          | 65.00  | 0.50  | 0.13      | 1.61                                 | 1.70                              | 5.23                      |
| 7          | 35.00  | 1.51  | 0.13      | 1.39                                 | 1.32                              | -5.51                     |
| 8          | 65.00  | 1.51  | 0.13      | 2.15                                 | 2.17                              | 1.02                      |
| 9          | 25.00  | 1.01  | 0.10      | 1.24                                 | 1.32                              | 6.16                      |
| 10         | 75.00  | 1.01  | 0.10      | 2.60                                 | 2.49                              | -4.54                     |
| 11         | 50.00  | 0.16  | 0.10      | 1.52                                 | 1.41                              | -7.88                     |
| 12         | 50.00  | 1.84  | 0.10      | 1.74                                 | 1.82                              | 4.36                      |
| 13         | 50.00  | 1.01  | 0.05      | 1.93                                 | 1.92                              | -0.39                     |
| 14         | 50.00  | 1.00  | 0.15      | 1.54                                 | 1.52                              | -1.61                     |
| 15         | 50.00  | 1.00  | 0.10      | 1.80                                 | 1.81                              | 0.37                      |
| 16         | 50.00  | 1.00  | 0.10      | 1.81                                 | 1.81                              | -0.04                     |
| 17         | 50.00  | 1.00  | 0.10      | 1.82                                 | 1.81                              | -0.49                     |
| 18         | 50.00  | 1.00  | 0.10      | 1.79                                 | 1.81                              | 0.87                      |
| 19         | 50.00  | 1.00  | 0.10      | 1.82                                 | 1.81                              | -0.46                     |
| 20         | 50.00  | 1.00  | 0.10      | 1.81                                 | 1.81                              | 0.07                      |

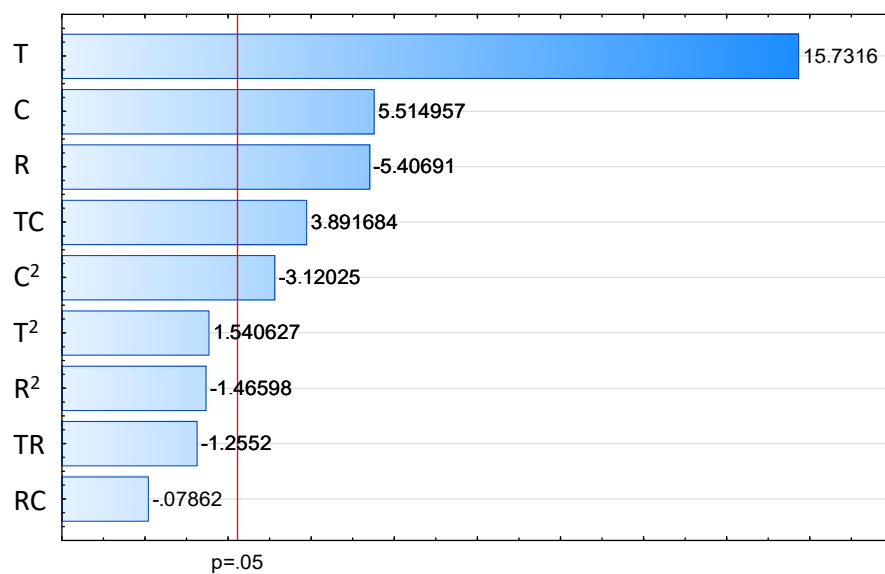

**Figure S3.** Pareto chart, using [Ch][Bic] as solvent.  $r^2 = 0.9713$ ;  $\text{adj-}r^2 = 0.946$ ; p-value = 0.000002.

T - temperature, R -solid-liquid ratio and C - concentration of IL.

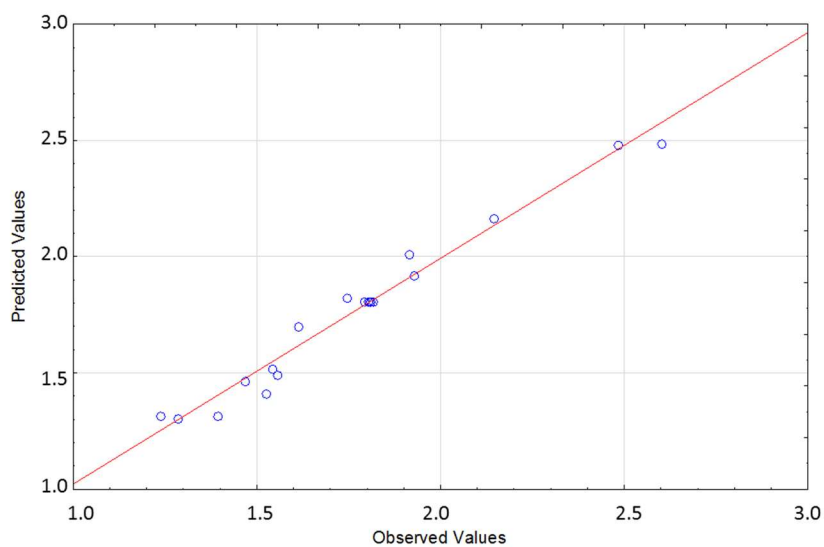

**Figure S4.** Predict vs observed values of caffeine yield (wt%) using [Ch][Bic] as solvent.

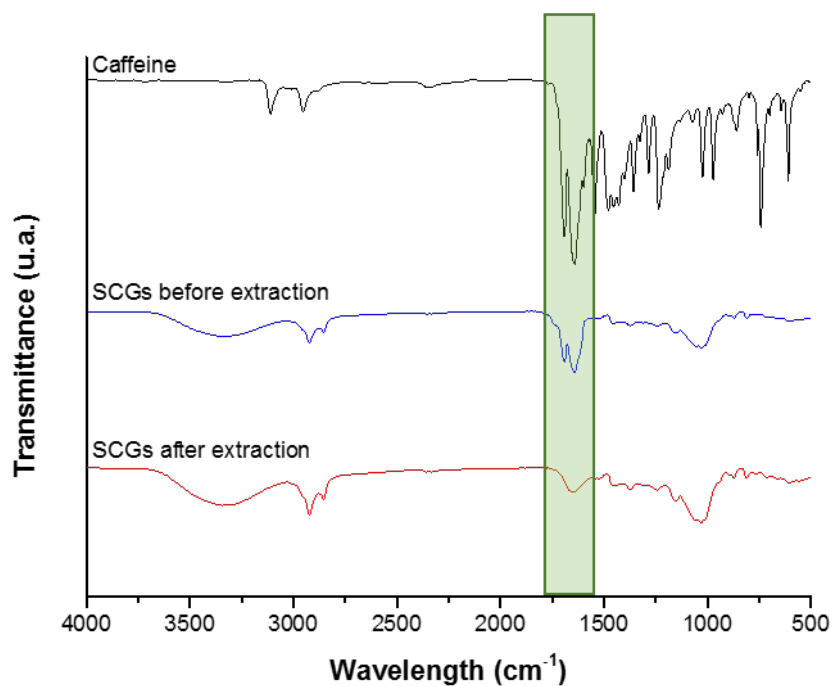

**Figure S5.** FTIR spectra of caffeine, SCGs sample before extraction, and SCGs samples after extraction using aqueous solution of [Ch][Bic] under the optimized operational conditions.

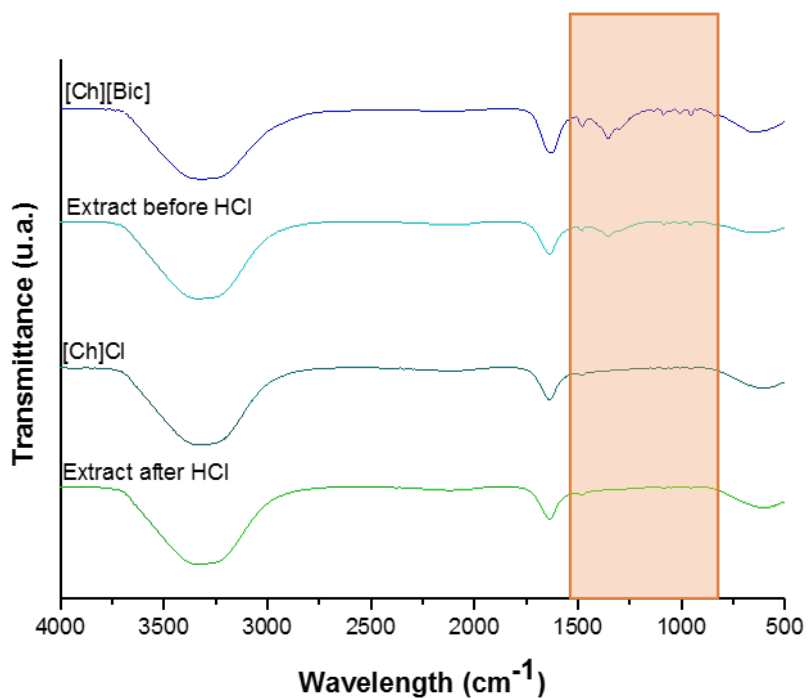

**Figure S6.** FTIR spectra corresponding to the pure ionic liquids, [Ch][Bic] and [Ch]Cl; and the extract obtained after six successive cycles, before and after addition of the HCl solution at 2 M.

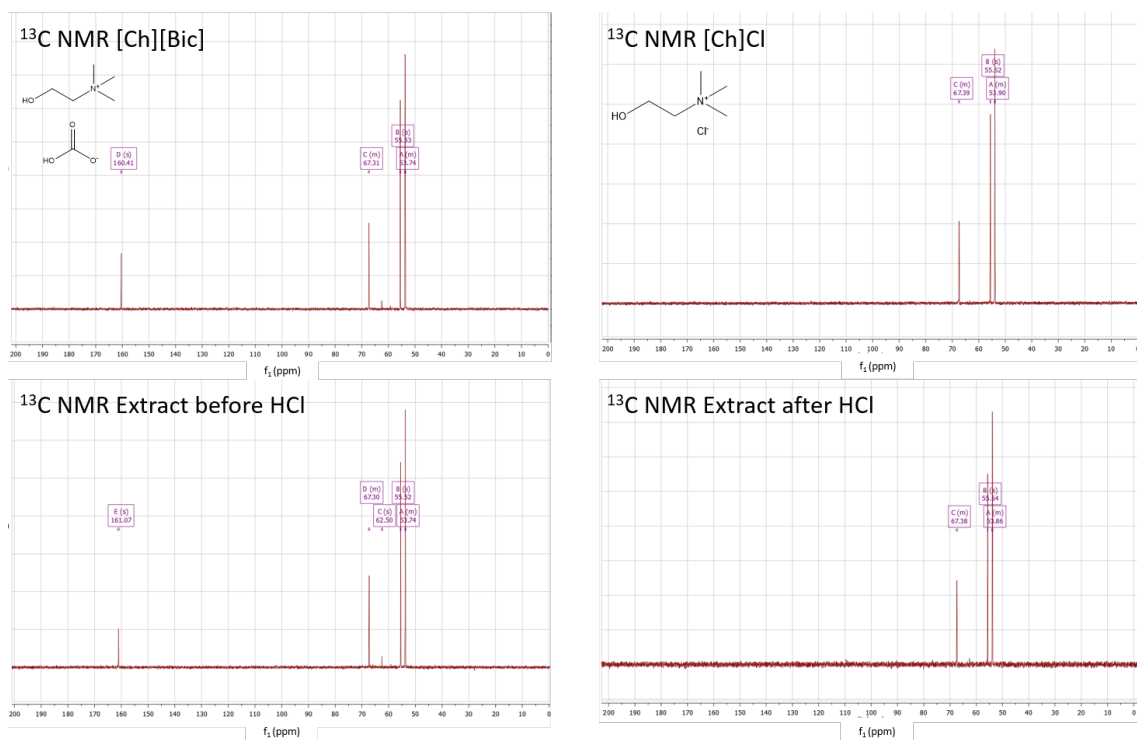

**Figure S7.**  $^{13}\text{C}$  NMR spectra of the pure ionic liquids, [Ch][Bic] and [Ch]Cl; and the extract obtained after six successive cycles, before and after addition of the HCl solution at 2 M.
